# Supplementary material for: Cancer-Related Fatigue in Head and Neck Cancer Survivors: Longitudinal Findings from the Head and Neck 5000 Prospective Clinical Cohort
Source: MDPI journal article supplement (doi:10.3390/cancers15194864), 2023-10-05
Supplement: s1 [file s1]

# Cancer-Related Fatigue in Head and Neck Cancer Survivors: Longitudinal Findings from the Head and Neck 5000 Prospective Clinical Cohort

Linda Sharp, Laura-Jayne Watson, Liya Lu, Sam Harding, Katrina Hurley, Steve J. Thomas and Joanne M. Patterson

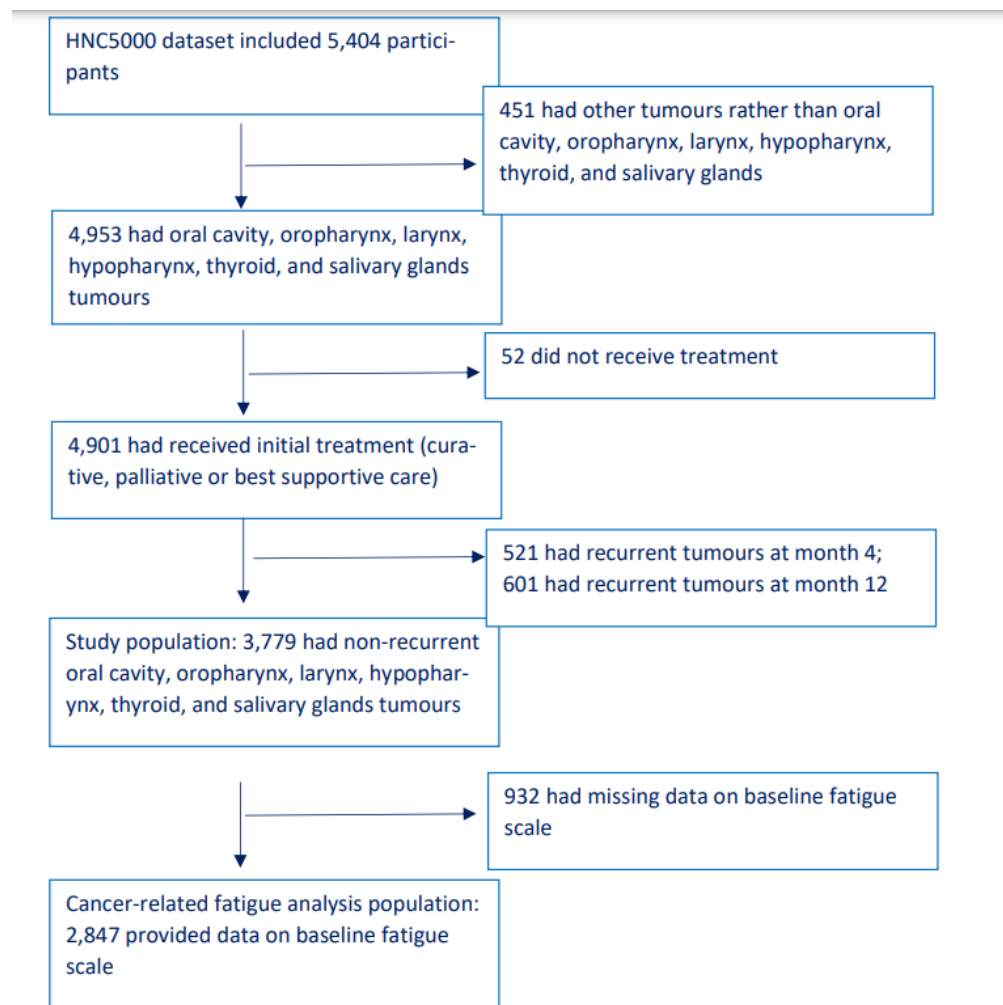

**Figure S1.** Flowchart showing study and analysis populations.

**Table S1.** Prevalence of clinically-important CRF<sup>1</sup> at baseline, 4 and 12 months, by socio-demographic, lifestyle, and other clinical variables at baseline: number who completed subscale (N), number who scored in range for clinically-important CRF (n) and percentages (%).

|                                       | Baseline |     |      | 4 months |     |      | 12 months |     |      |
|---------------------------------------|----------|-----|------|----------|-----|------|-----------|-----|------|
|                                       | N        | n   | %    | N        | n   | %    | N         | n   | %    |
| <b>Age at date of consent (years)</b> |          |     |      |          |     |      |           |     |      |
| <50                                   | 443      | 151 | 34.1 | 311      | 152 | 48.9 | 257       | 76  | 29.6 |
| 50–64                                 | 1341     | 375 | 28.0 | 1012     | 490 | 48.4 | 943       | 305 | 32.3 |
| ≥65                                   | 1063     | 265 | 24.9 | 833      | 322 | 38.7 | 757       | 199 | 26.3 |
| <b>Sex</b>                            |          |     |      |          |     |      |           |     |      |
| Male                                  | 2027     | 506 | 25.0 | 1536     | 685 | 44.6 | 1390      | 390 | 28.1 |
| Female                                | 820      | 285 | 34.8 | 620      | 279 | 45.0 | 567       | 190 | 33.5 |
| <b>Ethnicity</b>                      |          |     |      |          |     |      |           |     |      |
| White                                 | 2677     | 738 | 27.6 | 2031     | 912 | 44.9 | 1853      | 544 | 29.4 |

|                                           |      |     |      |      |     |      |      |     |      |
|-------------------------------------------|------|-----|------|------|-----|------|------|-----|------|
| Other                                     | 86   | 33  | 38.4 | 53   | 29  | 54.7 | 45   | 18  | 40.0 |
| Unknown                                   | 84   | 20  | 23.8 | 72   | 23  | 31.9 | 59   | 18  | 30.5 |
| <b>Marital status</b>                     |      |     |      |      |     |      |      |     |      |
| Married/cohabiting                        | 1910 | 493 | 25.8 | 1490 | 652 | 43.8 | 1363 | 368 | 27.0 |
| Other                                     | 837  | 264 | 31.5 | 605  | 284 | 46.9 | 541  | 194 | 35.9 |
| Unknown                                   | 100  | 34  | 34   | 61   | 28  | 45.9 | 53   | 18  | 34.0 |
| <b>Education</b>                          |      |     |      |      |     |      |      |     |      |
| Primary                                   | 35   | 13  | 37.1 | 24   | 11  | 45.8 | 22   | 11  | 50.0 |
| Secondary                                 | 1145 | 361 | 31.5 | 850  | 393 | 49.2 | 758  | 251 | 33.1 |
| Tertiary                                  | 1428 | 328 | 23.0 | 1126 | 475 | 42.2 | 1039 | 267 | 25.7 |
| Unknown                                   | 239  | 89  | 37.2 | 156  | 85  | 54.5 | 138  | 51  | 37.0 |
| <b>Deprivation quintile</b>               |      |     |      |      |     |      |      |     |      |
| 1 (least deprived)                        | 520  | 106 | 20.4 | 423  | 160 | 37.8 | 389  | 72  | 18.5 |
| 2                                         | 509  | 114 | 22.4 | 404  | 163 | 40.4 | 386  | 91  | 23.6 |
| 3                                         | 608  | 163 | 26.8 | 472  | 205 | 43.4 | 425  | 128 | 30.1 |
| 4                                         | 455  | 139 | 30.6 | 320  | 152 | 47.5 | 287  | 105 | 36.6 |
| 5 (most deprived)                         | 502  | 194 | 38.7 | 347  | 192 | 55.3 | 303  | 131 | 43.2 |
| Unknown                                   | 253  | 75  | 29.6 | 190  | 92  | 48.4 | 167  | 53  | 31.7 |
| <b>Smoking status</b>                     |      |     |      |      |     |      |      |     |      |
| Never                                     | 671  | 156 | 23.3 | 535  | 211 | 39.4 | 498  | 101 | 20.3 |
| Ex                                        | 1482 | 397 | 26.8 | 1146 | 497 | 43.4 | 1054 | 310 | 29.4 |
| Current                                   | 477  | 169 | 35.4 | 324  | 178 | 54.9 | 266  | 117 | 44.0 |
| Unknown                                   | 217  | 69  | 31.8 | 151  | 78  | 51.7 | 139  | 52  | 37.4 |
| <b>Alcohol consumed (days/week)</b>       |      |     |      |      |     |      |      |     |      |
| None                                      | 747  | 255 | 34.1 | 551  | 267 | 48.5 | 524  | 192 | 36.6 |
| 1-2                                       | 650  | 156 | 24.0 | 519  | 205 | 39.5 | 455  | 105 | 23.1 |
| 3-7                                       | 1241 | 305 | 24.6 | 955  | 419 | 43.9 | 859  | 234 | 27.2 |
| Unknown                                   | 209  | 75  | 35.9 | 131  | 73  | 55.7 | 119  | 49  | 41.2 |
| <b>Significant depression<sup>2</sup></b> |      |     |      |      |     |      |      |     |      |
| No                                        | 2325 | 442 | 19.0 | 1814 | 708 | 39.0 | 1643 | 381 | 23.2 |
| Yes                                       | 507  | 345 | 68.1 | 334  | 254 | 76.1 | 307  | 196 | 63.8 |
| Unknown                                   | 15   | 4   | 26.7 | 8    | 2   | 25.0 | 7    | 3   | 42.9 |
| <b>Stage</b>                              |      |     |      |      |     |      |      |     |      |
| I                                         | 788  | 222 | 28.2 | 601  | 189 | 31.5 | 534  | 132 | 24.7 |
| II                                        | 482  | 130 | 27.0 | 370  | 153 | 41.4 | 329  | 106 | 32.2 |
| III                                       | 389  | 107 | 27.5 | 309  | 133 | 43.0 | 279  | 88  | 31.5 |
| IV                                        | 1177 | 330 | 28.0 | 870  | 486 | 55.9 | 808  | 251 | 31.1 |
| Unknown                                   | 11   | 2   | 18.2 | 6    | 3   | 50.0 | 7    | 3   | 42.9 |
| <b>Comorbidity index</b>                  |      |     |      |      |     |      |      |     |      |
| No comorbidity                            | 1304 | 264 | 20.3 | 1016 | 396 | 39.0 | 910  | 199 | 21.9 |
| Mild decompensation                       | 942  | 276 | 29.3 | 720  | 348 | 48.3 | 675  | 212 | 31.4 |
| Moderate/severe decompensation            | 545  | 236 | 43.3 | 381  | 204 | 53.5 | 338  | 159 | 47.0 |
| Unknown                                   | 56   | 15  | 26.8 | 39   | 16  | 41.0 | 34   | 10  | 29.4 |
| <b>HPV16 E6</b>                           |      |     |      |      |     |      |      |     |      |
| Negative                                  | 1725 | 497 | 28.8 | 1311 | 511 | 39.0 | 1182 | 358 | 30.3 |
| Positive                                  | 760  | 174 | 22.9 | 579  | 316 | 54.6 | 554  | 151 | 27.3 |
| Unknown                                   | 362  | 120 | 33.1 | 266  | 137 | 51.5 | 221  | 71  | 21.1 |
| <b>Side of primary tumour</b>             |      |     |      |      |     |      |      |     |      |
| Unilateral                                | 2564 | 701 | 27.3 | 1945 | 864 | 44.4 | 1771 | 514 | 29.0 |
| Bilateral <sup>3</sup>                    | 274  | 87  | 31.8 | 205  | 97  | 47.3 | 181  | 63  | 34.8 |
| Unknown                                   | 9    | 3   | 33.3 | 6    | 3   | 50.0 | 5    | 3   | 60.0 |

<sup>1</sup> after linear transformation, possible scores may range from 0 to 100. A higher score indicates worse symptoms; <sup>2</sup> score of  $\geq 8$  on HADS depression subscale; <sup>3</sup> includes midline, bilateral, left/midline and right/midline.
